# Supplementary material for: Key factor for the anti-Arrhenius low-temperature heterogeneous catalysis induced by H+ migration: H+ coverage over support
Source: Royal Society of Chemistry journal article supplement (doi:10.1039/d0cc00482k), 2020-01-01
Supplement: d0cc00482k1.pdf [file d0cc00482k1.pdf]

## Electronic Supplementary Information (ESI)

### **Key factor for the anti-Arrhenius low-temperature heterogeneous catalysis induced by H<sup>+</sup> migration: H<sup>+</sup> coverage over support**

Kota Murakami,<sup>a</sup> Yuta Tanaka,<sup>a</sup> Ryuya Sakai,<sup>a</sup> Yudai Hisai,<sup>a</sup> Sasuga Hayashi,<sup>a</sup> Yuta Mizutani,<sup>a</sup>  
Takuma Higo,<sup>a</sup> Shuhei Ogo,<sup>a</sup> Jeong Gil Seo,<sup>b</sup> Hideaki Tsuneki,<sup>a</sup> Yasushi Sekine<sup>\*a</sup>

<sup>a</sup> Department of Applied Chemistry, Waseda University, 3-4-1 Okubo, Shinjuku, Tokyo, 169-8555 Japan.

<sup>b</sup> Department of Energy Science and Technology, Myongji University, Nam-dong, Cheoin-gu, Yongin-si, Gyeonggi-do  
449-728, South Korea

**Corresponding Author\*: Yasushi SEKINE**

E-mail address: ysekine@waseda.jp (Y. Sekine)

### **Table of Contents**

|                                                                        |       |
|------------------------------------------------------------------------|-------|
| 1. Experimental Procedure .....                                        | S1    |
| 2. Supplementary Figures and Tables (Figures S1-S5; Table S1-S6) ..... | S2-S7 |
| 3. References .....                                                    | S8    |

## 1. Experimental Procedures

### Preparation of 1wt%Ru/CeO<sub>2</sub>

As a catalyst support, CeO<sub>2</sub> (JRC-CEO-01) was used. Ruthenium was loaded on the CeO<sub>2</sub> using an impregnation method. First, CeO<sub>2</sub> was dispersed in acetone. Then it was stirred at room temperature for 2 h. An acetone solution of Ru(acac)<sub>3</sub> was added to the CeO<sub>2</sub> slurry and was stirred at room temperature for 2 h. After the solution was heated to evaporate the acetone, it was dried at 393 K for 24 h. The obtained sample was reduced at 723 K under H<sub>2</sub> (50 SCCM) and Ar (50 SCCM) flow for 2 h. Finally, the prepared catalysts were molded into 355–500 μm granules.

### Activity test

In all activity tests, a fixed-bed flow-type reactor was used. A schematic image of the apparatus is shown in Fig. S1. Two 2 mm-diameter stainless steel rods were attached to the catalyst bed as electrodes. The catalyst bed temperature was observed with a thermocouple inserted into the reactor and attached to the catalyst bed. Using a power supply device, 0–12 mA direct current was applied to the catalyst bed. The response voltage waves were detected using a digital oscilloscope (TDS 2001C; Tektronix Inc.). All activity tests were conducted with 100 mg catalyst. The catalyst was pre-reduced at 723 K under N<sub>2</sub> (60 SCCM) and H<sub>2</sub> (180 SCCM) for 2 h to activate ruthenium before the activity test. The synthesized ammonia was trapped in distilled water and was analyzed quantitatively using an ion chromatograph (IC-2001; Tosoh Co. Inc.).

The NH<sub>3</sub> synthesis rates with and without the electric field (Fig. 1(a), Fig. S4 and Table S1-S2) were detected under N<sub>2</sub> 60 SCCM and H<sub>2</sub> 180 SCCM.  $P_{H_2}$  dependence measurements (Fig. 1(b), Fig. S2 and Table S3-S6) were conducted under constant total flow (240 SCCM) and N<sub>2</sub> flow (60 SCCM) while the respective flows of H<sub>2</sub> and He were changed.

### *In-situ* FT-IR measurement in transmission mode

*In-situ* FT-IR measurements in transmission mode (FT-IR 6200; Jasco Corp.) were conducted with a CaF<sub>2</sub> window and MCT detector. The pelletized 1wt%Ru/CeO<sub>2</sub> (10 mmφ, 50 mg, 40 kN, 1 min) was used as a sample. The measurement flow was shown in Fig. S3. Firstly, the catalyst was pre-reduced at 723 K under N<sub>2</sub> (5 SCCM) and H<sub>2</sub> (15 SCCM) for 2 h. Afterward, the catalyst was purged under Ar (20 SCCM) at 673 K for 1 h to remove hydrogen over

lattice oxygen ( $O_{\text{lat}}$ ) of  $\text{CeO}_2$  surface. The complete desorption of hydrogen with purge was confirmed before this consideration (not shown here). Furthermore, the gas lines of Ar and  $\text{N}_2+\text{H}_2(\text{D}_2)$  were separated, and the gas line was well purged by Ar for 1 h in between the H/D exchange test. Then, background spectrum was measured under Ar (20 SCCM) at each objective temperature (323, 373, 423, 473, 573, and 673 K).  $O_{\text{lat}}-\text{D}^+$  stretching peaks were detected with  $\text{N}_2$  (5 SCCM) and  $\text{D}_2$  (15 SCCM) supply at each temperature. Before all  $O_{\text{lat}}-\text{D}^+$  stretching peaks observation, the catalyst was purged under Ar (20 SCCM) at 673 K for 1h.

### ***In-situ* DRIFTS measurements**

*In-situ* DRIFTS measurements (FT-IR 6200; Jasco Corp.) with/without the electric field (0 or 6 mA) at 323 K and 473 K were conducted with ZnSe window and MCT detector. The 1wt%Ru/ $\text{CeO}_2$  granules were used as a sample. The cell for DRIFTS measurements with the electric field does not have enough thermotolerance. Therefore, the experiments were conducted at lower than 473 K. Firstly, the catalyst was pre-treated at 473 K under  $\text{N}_2$  (5 SCCM) and  $\text{H}_2$  (15 SCCM) for 2 h. Then, the catalyst was purged under Ar (20 SCCM) at 473 K for 1 h. After that, background spectrum was measured under Ar (20 SCCM) at 323 and 473 K.  $O_{\text{lat}}-\text{D}^+$  stretching peaks were detected with  $\text{N}_2$  (5 SCCM) and  $\text{D}_2$  (15 SCCM) supply at each temperature with/without the electric field (0 or 6 mA). Before all  $O_{\text{lat}}-\text{D}^+$  stretching peaks observation, the catalyst was well purged under Ar (20 SCCM) at 473 K for 1h.

### **Characterizations**

The phase and morphology of  $\text{CeO}_2$ , 1wt%Ru/ $\text{CeO}_2$  (as made and after the activity test) were analyzed by X-ray diffraction (XRD, MiniFlex 600, Cu  $K\alpha$ ; Rigaku Corp.).

## **2. Supplementary Figures and Tables**

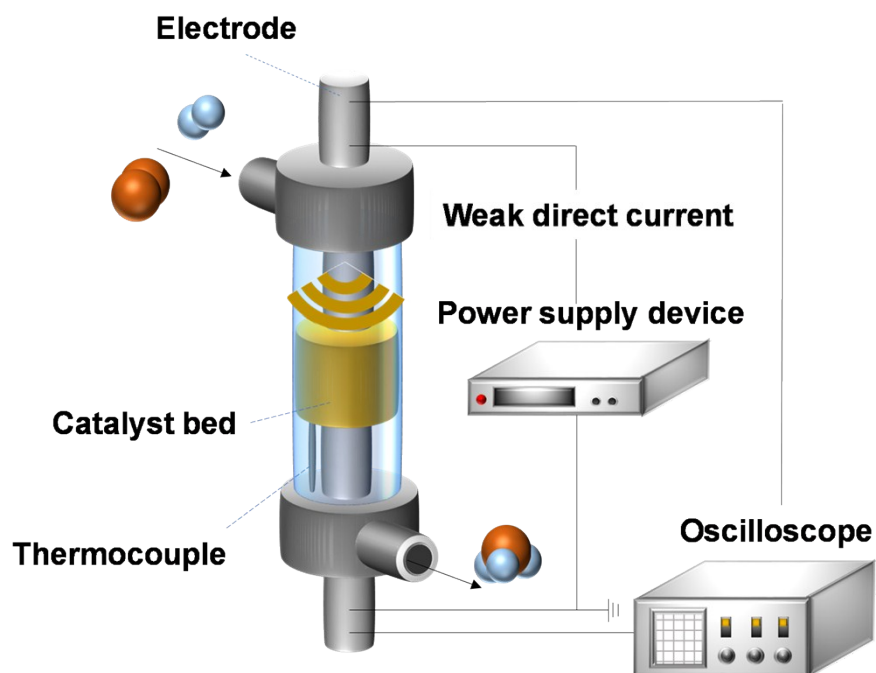

**Fig. S1** Schematic image of the reactor for ammonia synthesis in the electric field.

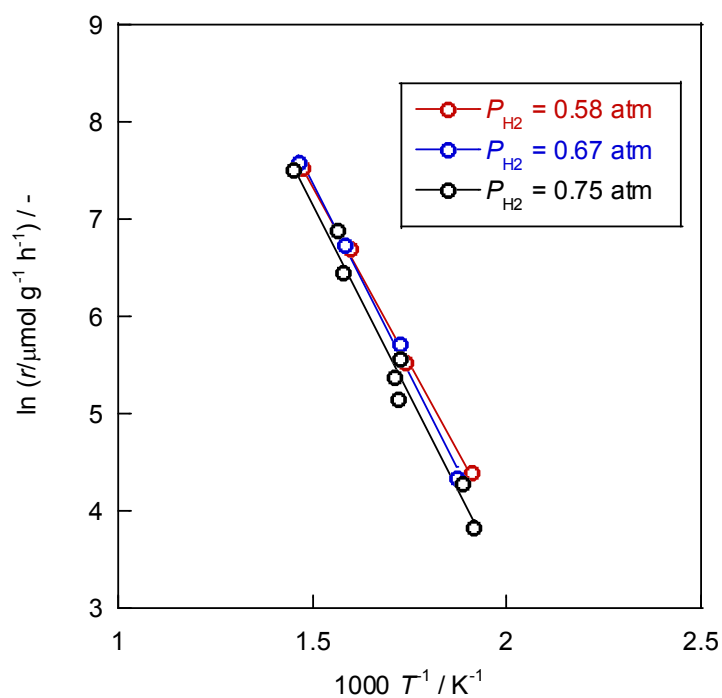

**Fig. S2** Arrhenius plots for  $\text{NH}_3$  synthesis rate ( $r$ ) over 1wt%Ru/CeO<sub>2</sub> under several  $P_{H_2}$  (0.58, 0.67 and 0.75 atm) without the electric field.

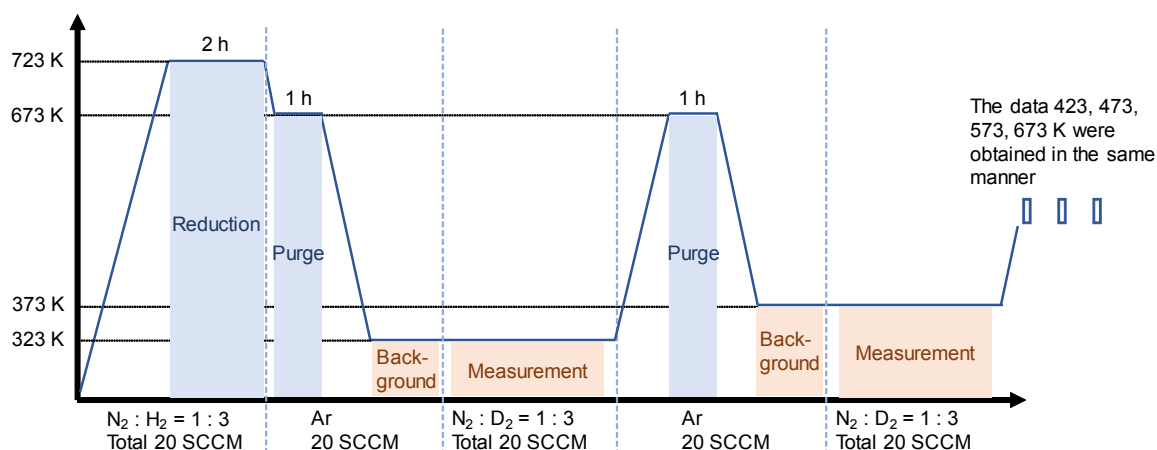

**Fig. S3** Flow of *in-situ* IR measurement in transparent mode.

*In-situ* DRIFTS measurements with/without the electric field was conducted. As for both setting temperatures (323 and 473 K), the application of the electric field resulted in slight decrease of the  $\text{O}_{\text{lat}}\text{-D}^+$  peak intensity. It will be caused by the temperature increase by the Joule heat. However, the decrement of the peak intensity by the electric field was smaller than that by the increase of the setting temperatures. Therefore, we concluded that the proton coverage without the electric field can use for the consideration in the main text.

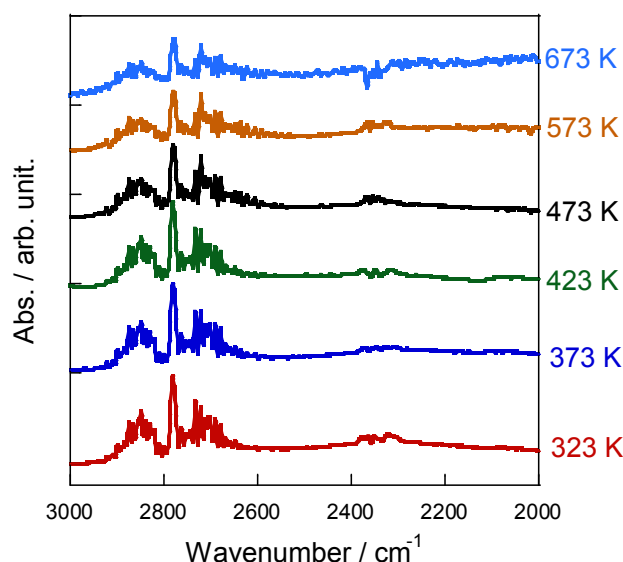

**Fig. S4** *in-situ* IR measurements for 1wt%Ru/CeO<sub>2</sub> under N<sub>2</sub> 5 SCCM and D<sub>2</sub> 15 SCCM.

No peaks assigned to the surface structure change were detected during IR measurements. The catalyst was treated at high temperature (723 K) before measurements, and the temperature during the measurement did not

exceed the pre-treatment temperature. Therefore, the catalyst structure was kept during the measurement. A little fluctuation was observed around 2300-2400  $\text{cm}^{-1}$ . It was caused by the change of  $P_{\text{CO}_2}$  outside the measurement cell.

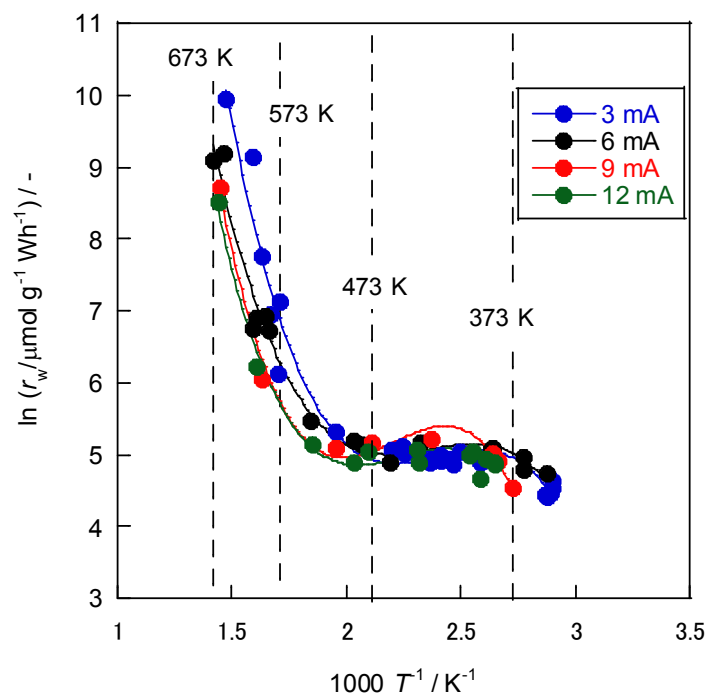

**Fig. S5** Arrhenius plots for  $\text{NH}_3$  synthesis rate per input power ( $r_w$ ) over 1wt%Ru/CeO<sub>2</sub> with 3–12 mA direct current.

$\text{NH}_3$  synthesis rate per applied power ( $r_w$ ) over 1wt%Ru/CeO<sub>2</sub> were considered. Here,  $r_w$  was calculated as shown in below

$$r_w = \frac{r}{I \times V} \quad (\text{S.1})$$

where  $I$  and  $V$  denotes applied current and voltage, respectively. The  $r_w$  exhibited almost constant value among all applied current. This trend corresponded to the previous studies. [Torimoto]

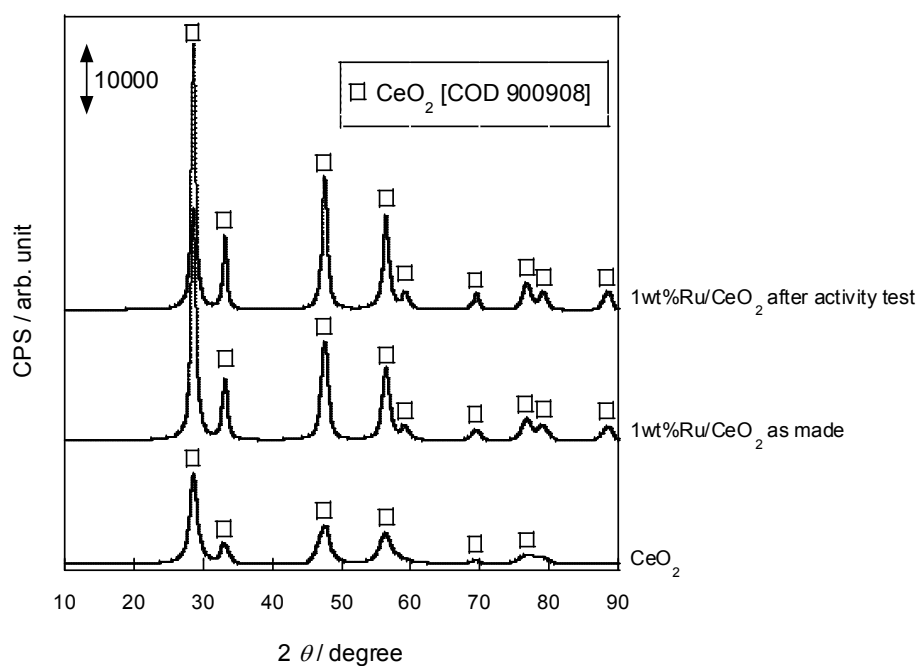

**Fig. S6** XRD patterns for  $\text{CeO}_2$  and 1wt%Ru/ $\text{CeO}_2$  (as made and after activity test).

The effects of the electric field on phase and morphology of  $\text{CeO}_2$  were considered using XRD measurements. As a result, no change was confirmed even after the activity tests with the electric field.

**Table S1** Temperature dependence of  $\text{NH}_3$  synthesis rate without the electric field under  $P_{\text{H}_2} = 0.75$  atm

| Catalyst bed temperature | $\text{NH}_3$ synthesis rate           | $1000/T$          | $\ln r$ |
|--------------------------|----------------------------------------|-------------------|---------|
| / K                      | / $\mu\text{mol g}^{-1} \text{h}^{-1}$ | / $\text{K}^{-1}$ | / -     |
| 522                      | 46.4                                   | 1.91              | 3.84    |
| 530                      | 73.0                                   | 1.89              | 4.29    |
| 580                      | 261.1                                  | 1.72              | 5.57    |
| 581                      | 173.9                                  | 1.72              | 5.16    |
| 585                      | 215.6                                  | 1.71              | 5.37    |
| 634                      | 637.8                                  | 1.58              | 6.46    |
| 641                      | 988.4                                  | 1.56              | 6.90    |
| 690                      | 1837.9                                 | 1.45              | 7.52    |

**Table S2** Temperature dependence of NH<sub>3</sub> synthesis rate with the electric field (6 mA) under  $P_{\text{H}_2} = 0.75$  atm

| Catalyst bed<br>temperature | Response voltage | NH <sub>3</sub> synthesis rate         | 1000/ $T$         | ln $r$ |
|-----------------------------|------------------|----------------------------------------|-------------------|--------|
| / K                         | / kV             | / $\mu\text{mol g}^{-1} \text{h}^{-1}$ | / $\text{K}^{-1}$ | / -    |
| 348                         | -0.19            | 131.4                                  | 2.88              | 4.88   |
| 360                         | -0.25            | 181.0                                  | 2.78              | 5.20   |
| 361                         | -0.24            | 208.3                                  | 2.77              | 5.34   |
| 379                         | -0.28            | 265.5                                  | 2.64              | 5.58   |
| 379                         | -0.28            | 266.4                                  | 2.64              | 5.58   |
| 430                         | -0.19            | 199.2                                  | 2.32              | 5.29   |
| 457                         | -0.20            | 157.7                                  | 2.19              | 5.06   |
| 484                         | -0.13            | 135.2                                  | 2.07              | 4.91   |
| 492                         | -0.16            | 168.0                                  | 2.03              | 5.12   |
| 541                         | -0.19            | 273.6                                  | 1.85              | 5.61   |
| 600                         | -0.08            | 416.5                                  | 1.67              | 6.03   |
| 606                         | -0.09            | 517.0                                  | 1.65              | 6.25   |
| 622                         | -0.12            | 716.3                                  | 1.61              | 6.57   |
| 629                         | -0.17            | 876.3                                  | 1.59              | 6.78   |
| 683                         | -0.03            | 1694.9                                 | 1.46              | 7.44   |
| 705                         | -0.05            | 2476.3                                 | 1.42              | 7.81   |



**Table S3** Temperature dependence of NH<sub>3</sub> synthesis rate without the electric field under  $P_{\text{H}_2} = 0.67$  atm

| Catalyst bed temperature | NH <sub>3</sub> synthesis rate         | 1000/ $T$         | $\ln r$ |
|--------------------------|----------------------------------------|-------------------|---------|
| / K                      | / $\mu\text{mol g}^{-1} \text{h}^{-1}$ | / $\text{K}^{-1}$ | / -     |
| 535.2                    | 77.4                                   | 1.87              | 4.35    |
| 579.7                    | 305.7                                  | 1.73              | 5.72    |
| 631.8                    | 849.2                                  | 1.58              | 6.74    |
| 683.3                    | 1985.2                                 | 1.46              | 7.59    |

**Table S4** Temperature dependence of NH<sub>3</sub> synthesis rate with the electric field (6 mA) under  $P_{\text{H}_2} = 0.67$  atm

| Catalyst bed temperature | Response voltage | NH <sub>3</sub> synthesis rate         | 1000/ $T$         | $\ln r$ |
|--------------------------|------------------|----------------------------------------|-------------------|---------|
| / K                      | / kV             | / $\mu\text{mol g}^{-1} \text{h}^{-1}$ | / $\text{K}^{-1}$ | / -     |
| 357.8                    | -0.22            | 212.5                                  | 2.79              | 5.36    |
| 389.5                    | -0.20            | 181.1                                  | 2.57              | 5.20    |
| 428.1                    | -0.20            | 177.8                                  | 2.34              | 5.18    |
| 482.2                    | -0.14            | 180.8                                  | 2.07              | 5.20    |
| 521.7                    | -0.12            | 176.7                                  | 1.92              | 5.17    |
| 566.3                    | -0.13            | 310.2                                  | 1.77              | 5.74    |
| 606.8                    | -0.10            | 610.1                                  | 1.65              | 6.41    |
| 646.7                    | -0.06            | 1254.5                                 | 1.55              | 7.13    |
| 689.5                    | -0.02            | 2367.4                                 | 1.45              | 7.77    |

**Table S5** Temperature dependence of NH<sub>3</sub> synthesis rate without the electric field under  $P_{\text{H}_2} = 0.58$  atm

| Catalyst bed temperature | NH <sub>3</sub> synthesis rate         | 1000/ $T$         | ln $r$ |
|--------------------------|----------------------------------------|-------------------|--------|
| / K                      | / $\mu\text{mol g}^{-1} \text{h}^{-1}$ | / $\text{K}^{-1}$ | / -    |
| 524                      | 81.3                                   | 1.91              | 4.40   |
| 576                      | 250.4                                  | 1.74              | 5.52   |
| 627                      | 805.7                                  | 1.60              | 6.69   |
| 678                      | 1854.5                                 | 1.47              | 7.53   |

**Table S6** Temperature dependence of NH<sub>3</sub> synthesis rate with the electric field (6 mA) under  $P_{\text{H}_2} = 0.58$  atm

| Catalyst bed temperature | Response voltage | NH <sub>3</sub> synthesis rate         | 1000/ $T$         | ln $r$ |
|--------------------------|------------------|----------------------------------------|-------------------|--------|
| / K                      | / kV             | / $\mu\text{mol g}^{-1} \text{h}^{-1}$ | / $\text{K}^{-1}$ | / -    |
| 342.5                    | -0.21            | 141.2                                  | 2.92              | 4.95   |
| 356.3                    | -0.22            | 173.4                                  | 2.81              | 5.16   |
| 364.0                    | -0.24            | 190.9                                  | 2.75              | 5.25   |
| 365.4                    | -0.19            | 161.3                                  | 2.74              | 5.08   |
| 369.3                    | -0.19            | 148.9                                  | 2.71              | 5.00   |
| 383.0                    | -0.18            | 143.6                                  | 2.61              | 4.97   |
| 404.0                    | -0.15            | 126.6                                  | 2.48              | 4.84   |
| 420.1                    | -0.18            | 144.0                                  | 2.38              | 4.97   |
| 436.7                    | -0.17            | 136.0                                  | 2.29              | 4.91   |
| 438.6                    | -0.16            | 131.8                                  | 2.28              | 4.88   |
| 472.8                    | -0.13            | 144.8                                  | 2.12              | 4.98   |
| 473.8                    | -0.14            | 152.6                                  | 2.11              | 5.03   |
| 521.7                    | -0.15            | 253.2                                  | 1.92              | 5.53   |
| 591.9                    | -0.06            | 466.5                                  | 1.69              | 6.15   |

|       |       |        |      |      |
|-------|-------|--------|------|------|
| 639.8 | -0.06 | 1156.5 | 1.56 | 7.05 |
| 643.7 | -0.02 | 1371.7 | 1.55 | 7.22 |
| 684.2 | -0.02 | 2304.3 | 1.46 | 7.74 |

---

### 3. References

[Torimoto] M. Torimoto, S. Ogo, D. Harjowinoto, T. Higo, J. G. Seo, S. Furukawa and Y. Sekine, *Chem. Commun.*, 2019, **55**, 6693-6695.
